# Supplementary material for: Inverted polymer fullerene solar cells exceeding 10% efficiency with poly(2-ethyl-2-oxazoline) nanodots on electron-collecting buffer layers
Source: PubMed Central journal article supplement (PMC4682173; doi:10.1038/ncomms9929), 2015-12-14
Supplement: ncomms9929-s1.pdf [file ncomms9929-s1.pdf]

|                                                                                                                                                                                                             |                                                  |                                                                                                   |
|-------------------------------------------------------------------------------------------------------------------------------------------------------------------------------------------------------------|--------------------------------------------------|---------------------------------------------------------------------------------------------------|
| <br>KOREA INSTITUTE OF ENERGY RESEARCH<br>한국에너지기술연구원                                                                       | <h2 style="text-align: center;">Test Report</h2> | Report No.:<br><b>KIER-14-0915</b>                                                                |
|                                                                                                                                                                                                             |                                                  | Page(1) / (6)Pages                                                                                |
| 152, Gajeong-ro, Yuseong-gu, Daejeon, 305-343, Korea<br>(Tel: +82 42 860 3182 Fax: +82 42 860 3309)                                                                                                         |                                                  |                                                                                                   |
| <b>1. Client</b><br>• Name : KNU<br>• Address : 80, Daehak-ro, Buk-gu, Daegu, 702-701, Korea<br>• Date of Receipt : 2014.12.05                                                                              |                                                  |                                                                                                   |
| <b>2. Use of Report</b> : Test and Evaluation.                                                                                                                                                              |                                                  |                                                                                                   |
| <b>3. Test Sample</b> : OPV solar-cell                                                                                                                                                                      |                                                  |                                                                                                   |
| <b>4. Date of Test</b> : 2014.12.09                                                                                                                                                                         |                                                  |                                                                                                   |
| <b>5. Test method used</b> : KS C IEC 60904-1                                                                                                                                                               |                                                  |                                                                                                   |
| <b>6. Testing Environment</b><br>• Temperature : (25.0 ± 1.0) °C, Humidity : (50.0 ± 5.0) % R.H.                                                                                                            |                                                  |                                                                                                   |
| <b>7. Test Results</b> : Refer to attachment                                                                                                                                                                |                                                  |                                                                                                   |
| The results shown in this Test Report refer only to the sample(s) tested unless otherwise stated.<br>This Test Report must not be used for any commercial advertisement, sale promotion or troubleshooting. |                                                  |                                                                                                   |
| Affirmation                                                                                                                                                                                                 | Tested by<br>Name : YoungJoo Eo (Signature)      | Technical Manager<br>Name : SeungKyu Ahn (Signature)                                              |
|                                                                                                                                                                                                             |                                                  | 2014.12.24<br> |
| <b>Korea Institute of Energy Research</b>                                                                                                                                                                   |                                                  |                                                                                                   |

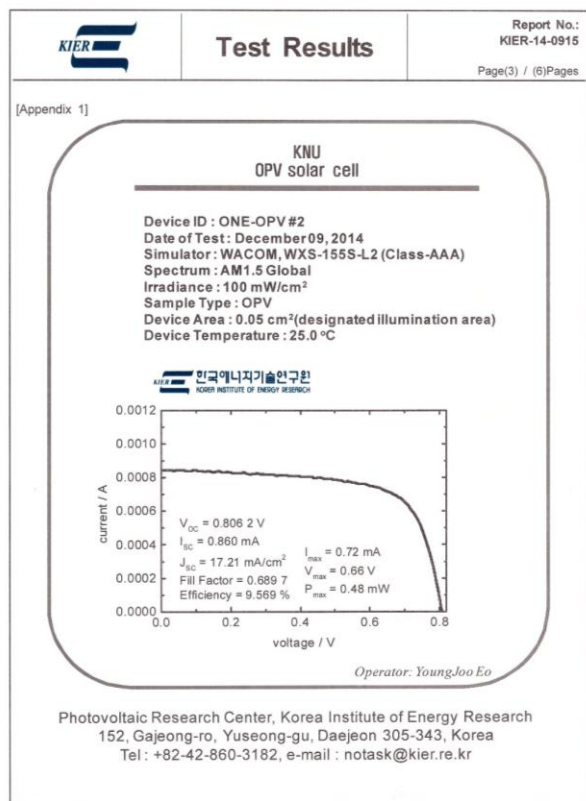

**Supplementary Figure 1. Certificate of device performance.** Copy of the certified results for the inverted PTB7-Th:PC<sub>71</sub>BM solar cells with the ZnO/PEOz(4) layer. The solar cell measurements were carried out by the National Solar Cell Accreditation Center of Korea Institute of Energy Research (KIER). Note that the device test was performed in air ambient condition so that the resulting device performance might be slightly lowered owing to the degradation by the attack of environmental moisture and oxygen. A black shadow mask was attached on the front glass side of the solar cell in order to avoid a waveguide effect by surrounding glass substrate that is not included in the active area.

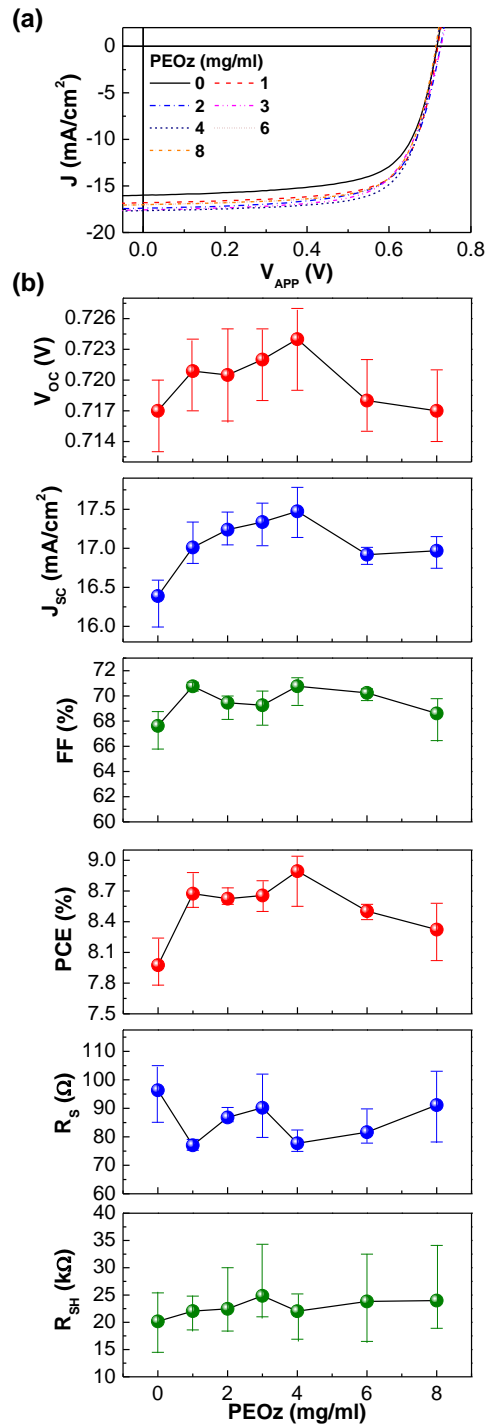

**Supplementary Figure 2. Solar cell performances.** (a) Light J-V curves of the inverted-type PTB7:PC<sub>71</sub>BM solar cells under one sun condition (air mass 1.5G, 100 mW/cm<sup>2</sup>). (b)  $J_{sc}$ ,  $V_{oc}$ , FF, PCE,  $R_s$ , and  $R_{sh}$  for the PTB7:PC<sub>71</sub>BM solar cells as a function of PEOz concentration. Note that the error bars were taken from more than 15 devices.

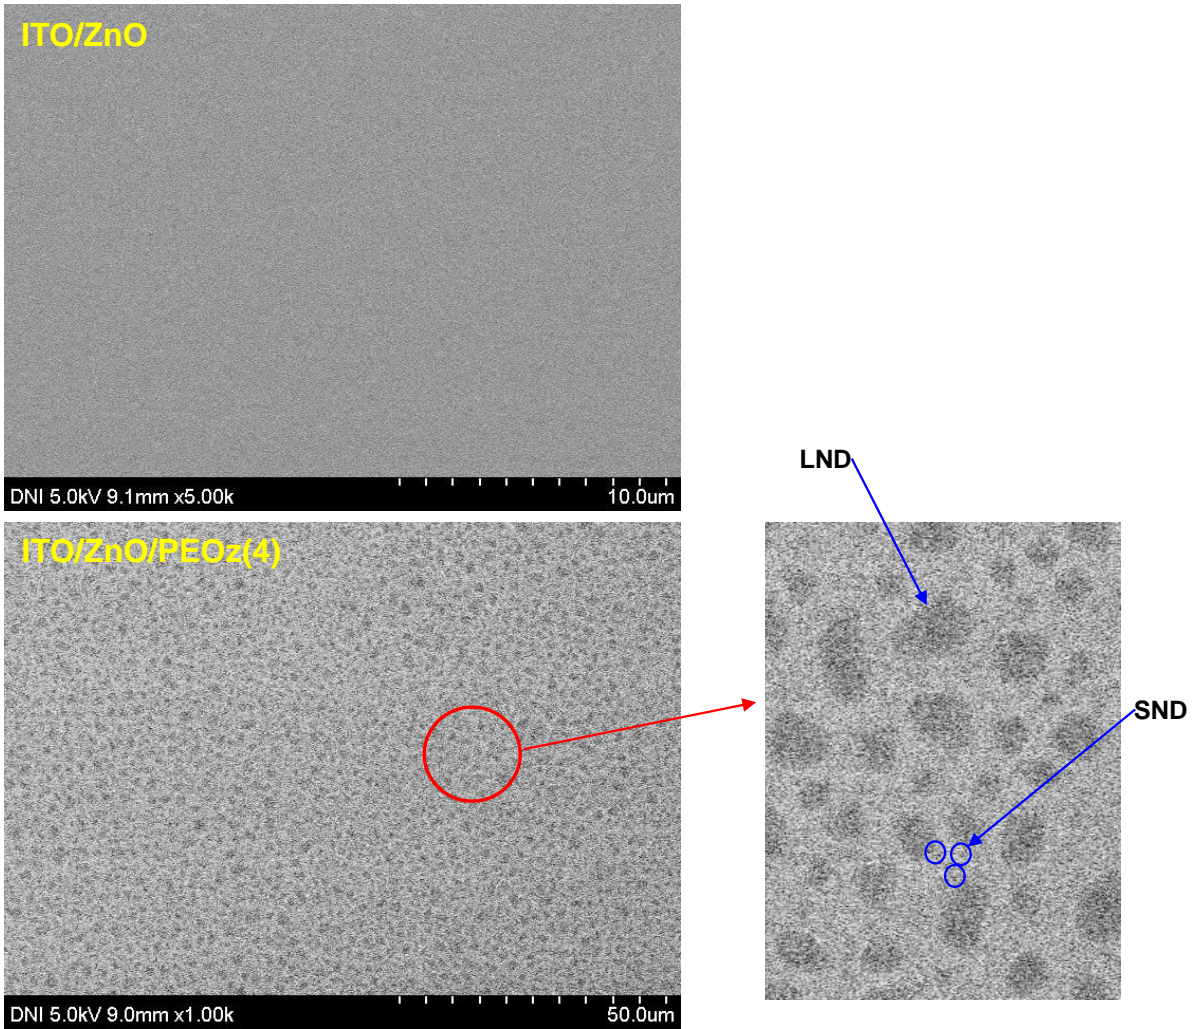

**Supplementary Figure 3. Surface morphology.** SEM images for the ZnO surface with and without the PEOz(4) layer: (a) ITO/ZnO (top), (b) ITO/ZnO/PEOz(4) layer (bottom). ‘SND’ and ‘LND’ denote ‘small nano-dots’ and ‘large nano-dots in the enlarged image (right), respectively.

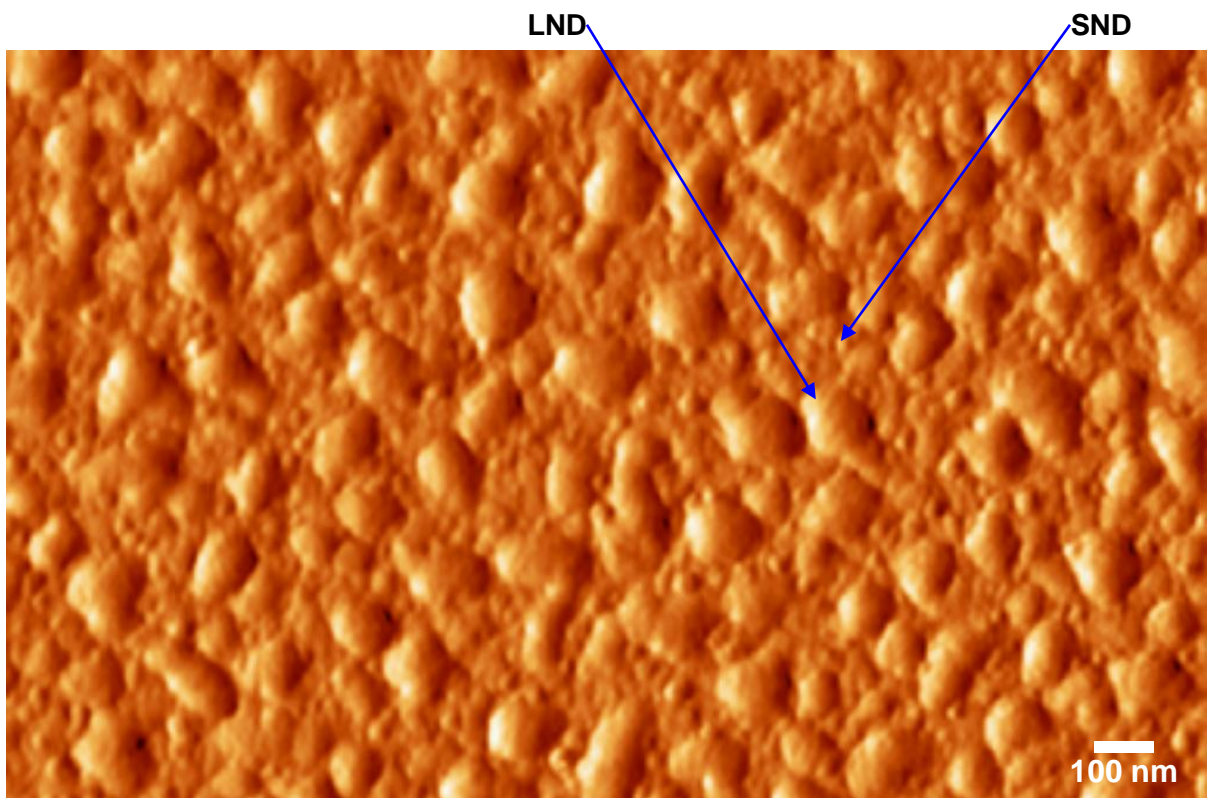

**Supplementary Figure 4. Nano-dot structures.** The enlarged phase-mode AFM image in Fig. 5(b) in order to clearly see the co-existence of both small nano-dots (SND) and large nano-dots (LND).

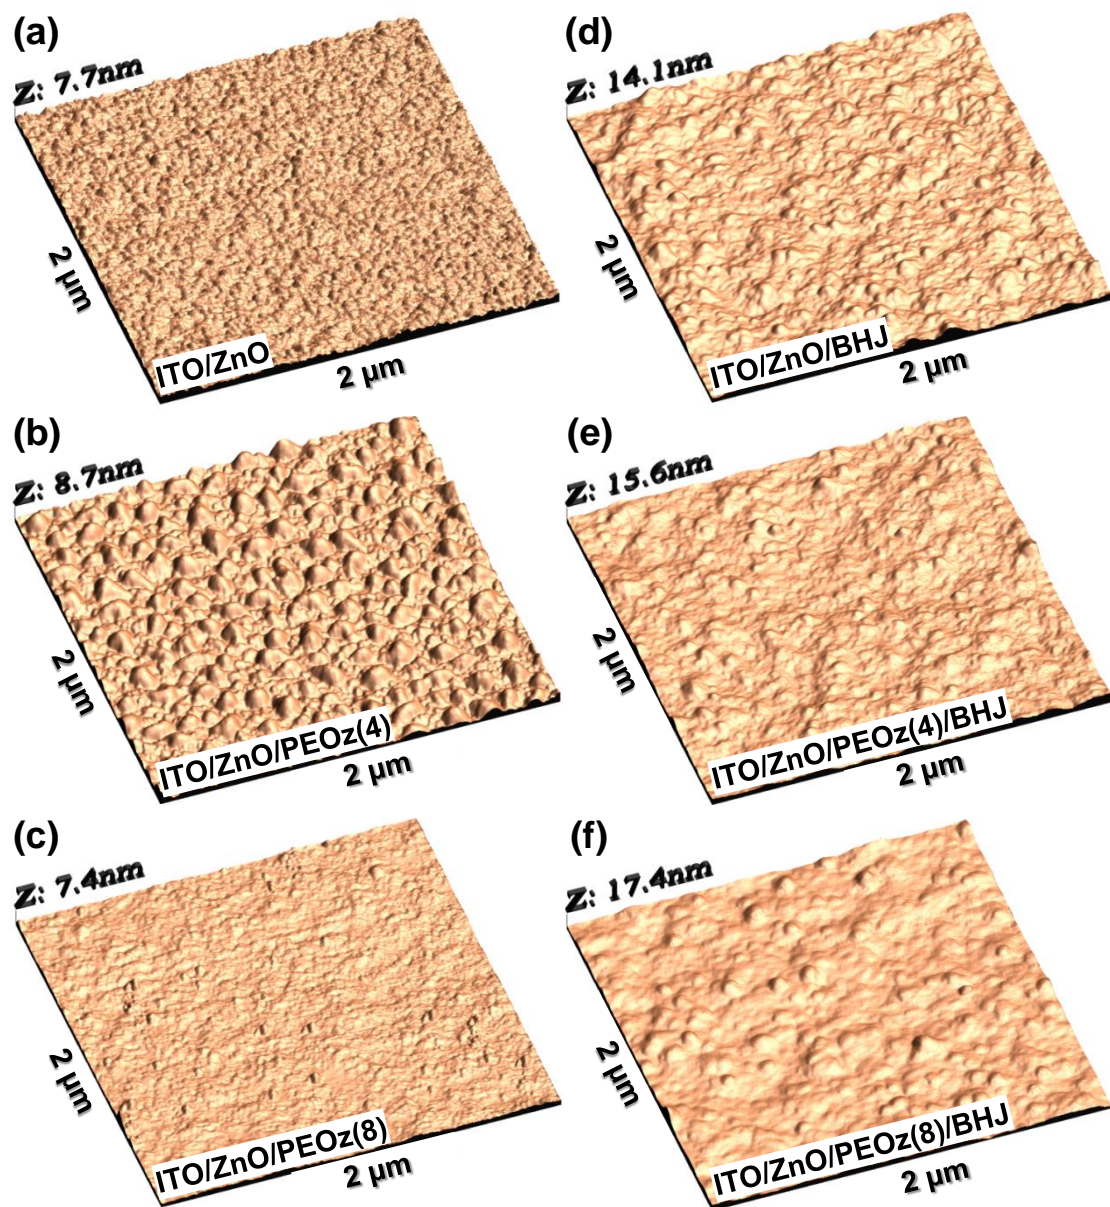

**Supplementary Figure 5. Surface morphology.** 3D height-mode of AFM images: (a) ITO/ZnO, (b) ITO/ZnO/PEOz(4), (c) ITO/ZnO/PEOz(8), (d) ITO/ZnO/BHJ, (e) ITO/ZnO/PEOz(4)/BHJ, (f) ITO/ZnO/PEOz(8)/BHJ. The ‘BHJ’ layer represents ‘PTB7-Th:PC<sub>71</sub>BM’ layer.

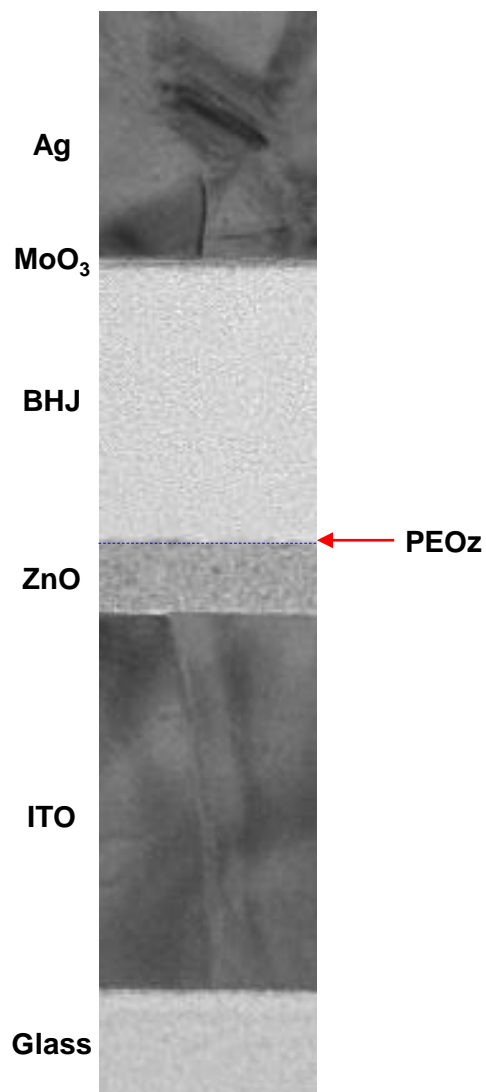

**Supplementary Figure 6. Cross-section structure of device.** HRTEM image for the cross-section part of the PTB7-Th:PC<sub>71</sub>BM solar cell with the PEOz(4) nanolayer. Note that the device cross-section sample was obtained by using the FIB system. The shape of the PEOz(4) in this image is unclear but vaguely observed because of the very thin state.

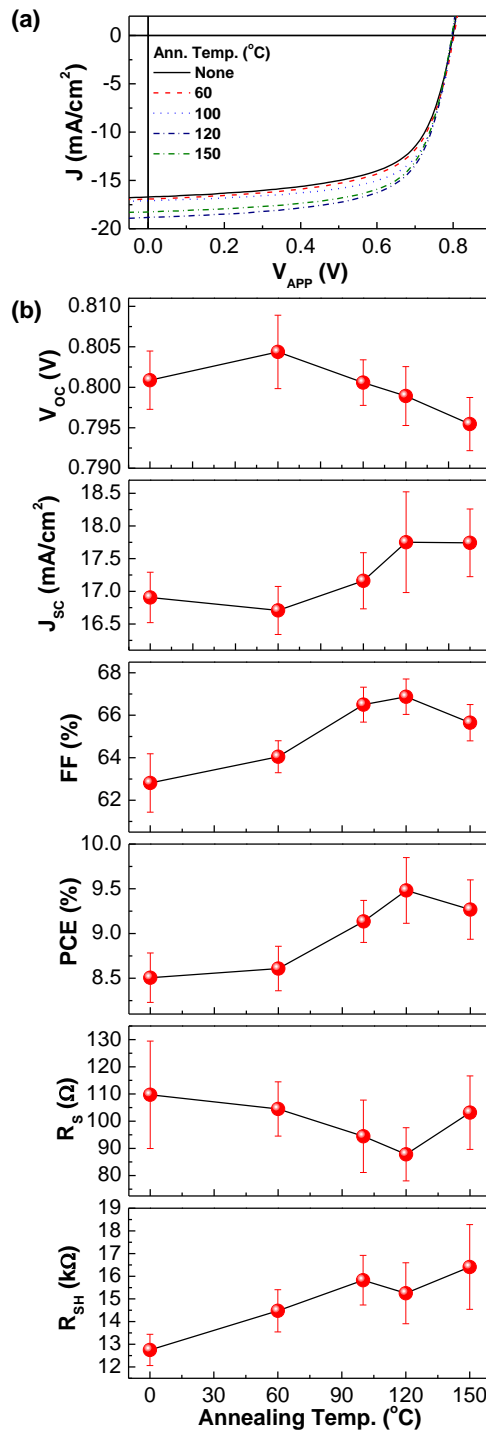

**Supplementary Figure 7. Solar cell performances.** (a) Light J-V curves of the inverted-type PTB7-Th:PC<sub>71</sub>BM solar cells with the PEOz(4) layer according to the thermal annealing temperature under one sun condition (air mass 1.5G, 100 mW/cm<sup>2</sup>). (b)  $J_{SC}$ ,  $V_{OC}$ , FF, PCE,  $R_S$ , and  $R_{SH}$  for the inverted-type PTB7-Th:PC<sub>71</sub>BM solar cells with the PEOz(4) layer as a function of the thermal annealing temperature. Note that the error bars were taken from more than 10 devices.

**Supplementary Table 1.** Summary of recent high efficiency results (PCE > 9.5 %) reported for single-stack polymer:fullerene solar cells.

| No | Author (Affiliation)                 | Active Materials                | Device Structure   | Key Points                                         | Best PCE (%) | Year | Ref |
|----|--------------------------------------|---------------------------------|--------------------|----------------------------------------------------|--------------|------|-----|
| 1  | Y. Liu (Hong Kong Uni.)              | PffBT4T-2OD:PC <sub>71</sub> BM | Inverted           | Temperature-dependent aggregation                  | 10.8         | 2014 | S1  |
| 2  | S.-H. Liao (National Tsing-Hua Uni.) | PTB7-Th:PC <sub>71</sub> BM     | Inverted           | InZnO-BisC <sub>60</sub> electron collection layer | 10.3         | 2014 | S2  |
| 3  | C. Liu (Uni. Akron)                  | PTB7-DT:PC <sub>71</sub> BM     | Normal             | Introduction of 5-alkylthiophene-2-yl side chains  | 10.1         | 2015 | S3  |
| 4  | Z. He (South China Uni. Tech.)       | PTB7-Th:PC <sub>71</sub> BM     | Inverted           | PC <sub>71</sub> BM weight fractions               | 10.6         | 2015 | S4  |
| 5  | This Work                            | PTB7-Th:PC <sub>71</sub> BM     | Inverted Structure | PEOz nano-dot interfacial layer                    | 10.7         | 2015 | -   |

### Supplementary References

1. Y. Liu, J. Zhao, Z. Li, C. Mu, W. Ma, H. Hu, K. Jiang, H. Lin, H. Ade, and H. Yan, *Nat. Commun.*, **2014**, *5*, 5293, DOI: 10.1038/ncomms6293.
2. S.-H. Liao, H.-J. Jhuo, P.-N. Yeh, Y.-S. Cheng, Y.-L. Li, Y.-H. Lee, S. Sharma, S.-A. Chen, *Sci. Rep.*, **2014**, *4*, 6813, DOI: 10.1038/srep06813.
3. C. Liu, C. Yi, K. Wang, Y. Yang, R. S. Bhatta, M. Tsige, S. Xiao, and X. Gong, *ACS Appl. Mater. Interfaces* **2015**, *7*, 4928-4935.
4. Z. He, B. Xiao, F. Liu, H. Wu, Y. Yang, S. Xiao, C. Wang, T. P. Russell, and Y. Cao, *Nat. Photon.*, **2015**, *9*, 174.
